# Supplementary material for: Comprehensive evaluation of oil quality of 98 varieties with different maturity levels from the Bailongjiang River Valley area in Longnan, China
Source: Research Square preprint supplement (doi:10.21203/rs.3.rs-7212338/v1), 2025-08-04
Supplement: Supplementary file 1 [file 1662196b1232699477a861a0.docx]

**Table S1.** Oil content and fatty acid composition and secondary metabolite components of olive oil of 98 olive varieties

| **Variety number** | **maturity level** | **Saturated fatty acids / %** | | | **Monounsaturated fatty acids / %** | | | **Polyunsaturated fatty acid / %** | | **Content of oil secondary metabolite fractions** | | | |
| --- | --- | --- | --- | --- | --- | --- | --- | --- | --- | --- | --- | --- | --- |
| Palmitic acid (C16:0) | Stearic acid (C18:0) | Arachidic acid (C20:0) | Palmitoleic acid (C16:1) | cis-11-Eicosenoic acid (C20:1) | Oleic acid (C18:1) | Linoleic acid (C18:2) | *α* - Linolenic acid (C18:3) | Squalene /( mg•kg-1 ) | *β* - Sitosterol/(mg•kg-1) | Total polyphenols /( mg•kg-1) | α - Tocopherol /( × 10-2 mg•g-1) |
| S1 | I | 12.40 | 2.61 | 0.43 | 0.80 | 76.40 | 0.30 | 6.50 | 0.53 | 3384.30 | 1017.80 | 40.80 | 20.70 |
| Ⅱ | 12.50 | 2.46 | 0.41 | 0.89 | 76.00 | 0.30 | 6.80 | 0.56 | 3103.60 | 955.80 | 40.20 | 20.70 |
| Ⅲ | 13.00 | 2.68 | 0.40 | 1.14 | 73.80 | 0.27 | 8.16 | 0.51 | 3505.50 | 1164.60 | 40.70 | 20.70 |
| S2 | I | 14.70 | 2.43 | 0.44 | 1.18 | 69.80 | 0.31 | 10.40 | 0.79 | 7316.40 | 950.10 | 112.00 | 18.60 |
| Ⅱ | 15.30 | 2.38 | 0.43 | 1.31 | 67.60 | 0.31 | 11.90 | 0.80 | 8434.60 | 883.50 | 112.30 | 18.60 |
| Ⅲ | 15.30 | 2.44 | 0.44 | 1.36 | 66.40 | 0.30 | 12.90 | 0.86 | 7895.50 | 1016.00 | 112.20 | 18.60 |
| S3 | I | 16.20 | 2.99 | 0.56 | 1.29 | 67.10 | 0.34 | 10.70 | 0.84 | 7146.10 | 1010.30 | 123.00 | 21.20 |
| Ⅱ | 16.50 | 2.74 | 0.50 | 1.47 | 63.30 | 0.30 | 14.30 | 0.91 | 5761.00 | 1039.60 | 129.80 | 21.10 |
| Ⅲ | 16.60 | 2.66 | 0.47 | 1.45 | 60.20 | 0.30 | 17.30 | 0.96 | 5567.90 | 1101.50 | 129.60 | 21.23 |
| S4 | I | 12.00 | 2.31 | 0.44 | 0.87 | 77.30 | 0.37 | 6.08 | 0.62 | 4051.90 | 696.40 | 81.10 | 11.70 |
| Ⅱ | 11.70 | 2.44 | 0.44 | 0.89 | 77.50 | 0.36 | 6.19 | 0.56 | 4624.00 | 624.10 | 81.10 | 11.60 |
| Ⅲ | 11.60 | 2.78 | 0.49 | 0.79 | 77.00 | 0.38 | 6.27 | 0.68 | 4937.20 | 817.40 | 81.02 | 11.60 |
| S5 | I | 13.60 | 2.48 | 0.42 | 0.57 | 69.40 | 0.33 | 12.40 | 0.89 | 966.10 | 1724.10 | 81.30 | 12.90 |
| Ⅱ | 13.90 | 2.09 | 0.34 | 0.82 | 65.50 | 0.29 | 16.40 | 0.62 | 720.50 | 1277.20 | 82.30 | 13.00 |
| Ⅲ | 14.60 | 2.00 | 0.31 | 1.14 | 61.10 | 0.25 | 20.10 | 0.56 | 846.60 | 1232.30 | 81.30 | 12.10 |
| S6 | I | 12.00 | 2.37 | 0.43 | 0.41 | 73.20 | 0.39 | 10.40 | 0.77 | 1426.60 | 1400.20 | 75.10 | 15.80 |
| Ⅱ | 12.20 | 2.29 | 0.39 | 0.44 | 71.00 | 0.36 | 12.70 | 0.67 | 1597.60 | 1099.40 | 74.90 | 15.30 |
| Ⅲ | 12.90 | 2.16 | 0.33 | 0.72 | 67.20 | 0.30 | 15.80 | 0.60 | 1361.80 | 1185.70 | 73.20 | 15.80 |
| S7 | I | 11.90 | 2.33 | 0.41 | 0.46 | 73.90 | 0.39 | 9.78 | 0.86 | 1525.60 | 1532.80 | 79.40 | 19.10 |
| Ⅱ | 12.30 | 2.04 | 0.34 | 0.63 | 69.60 | 0.33 | 14.20 | 0.59 | 1464.40 | 1196.10 | 79.30 | 19.20 |
| Ⅲ | 13.30 | 2.00 | 0.31 | 0.82 | 66.60 | 0.29 | 16.10 | 0.60 | 1630.20 | 1032.80 | 78.10 | 18.90 |
| S8 | I | 16.60 | 1.79 | 0.41 | 1.14 | 66.60 | 0.34 | 11.50 | 1.65 | 1311.20 | 2631.00 | 97.80 | 47.30 |
| Ⅱ | 16.90 | 1.76 | 0.34 | 1.47 | 63.50 | 0.26 | 14.60 | 1.23 | 854.80 | 1716.80 | 97.30 | 50.00 |
| Ⅲ | 16.70 | 2.04 | 0.33 | 1.70 | 62.30 | 0.23 | 15.70 | 0.99 | 1020.30 | 1503.40 | 97.20 | 49.10 |
| S9 | I | 16.50 | 1.90 | 0.35 | 1.99 | 63.50 | 0.24 | 14.50 | 0.95 | 7518.30 | 1282.00 | 81.30 | 13.80 |
| Ⅱ | 16.70 | 1.77 | 0.32 | 2.37 | 62.80 | 0.23 | 14.90 | 0.90 | 7753.60 | 1291.80 | 81.20 | 14.00 |
| Ⅲ | 18.00 | 1.84 | 0.30 | 3.17 | 57.60 | 0.20 | 18.00 | 0.93 | 11035.80 | 1031.40 | 80.00 | 11.20 |
| S10 | I | 13.10 | 1.65 | 0.34 | 0.96 | 73.90 | 0.36 | 9.02 | 0.67 | 2399.80 | 1161.90 | 72.90 | 11.50 |
| Ⅱ | 13.60 | 1.65 | 0.32 | 1.33 | 70.60 | 0.32 | 11.60 | 0.68 | 1998.20 | 1110.00 | 72.30 | 12.10 |
| Ⅲ | 13.80 | 1.87 | 0.32 | 1.40 | 69.60 | 0.30 | 12.00 | 0.71 | 1682.20 | 1275.50 | 70.20 | 13.00 |
| S11 | I | 16.10 | 2.65 | 0.49 | 1.41 | 68.00 | 0.31 | 10.30 | 0.73 | 6802.80 | 715.50 | 98.60 | 17.10 |
| Ⅱ | 16.30 | 2.57 | 0.47 | 1.53 | 64.20 | 0.30 | 13.80 | 0.83 | 6552.30 | 904.60 | 98.70 | 17.20 |
| Ⅲ | 16.20 | 2.55 | 0.45 | 1.50 | 61.90 | 0.30 | 16.20 | 0.86 | 6268.90 | 936.80 | 96.60 | 17.20 |
| S12 | I | 9.23 | 2.15 | 0.36 | 0.74 | **82.90** | 0.39 | 3.49 | 0.72 | 5448.50 | 1134.90 | 75.40 | 19.70 |
| Ⅱ | 9.28 | 2.17 | 0.37 | 0.71 | **79.19** | 0.30 | 3.19 | 0.77 | 5631.10 | 1124.60 | 75.40 | 19.20 |
| Ⅲ | 9.26 | 2.21 | 0.33 | 0.77 | **78.91** | 0.32 | 3.21 | 0.76 | 5548.50 | 1124.10 | 75.00 | 19.80 |
| S13 | I | 12.10 | 2.30 | 0.37 | 0.92 | 80.20 | 0.28 | 2.97 | 0.84 | 4359.00 | 1437.50 | 60.60 | 12.90 |
| Ⅱ | 12.40 | 2.49 | 0.36 | 1.17 | 78.50 | 0.26 | 4.10 | 0.79 | 5067.30 | 1464.00 | 66.20 | 12.60 |
| Ⅲ | 12.10 | 2.85 | 0.34 | 1.11 | 78.80 | 0.24 | 3.84 | 0.70 | 6252.30 | 1175.10 | 59.20 | 12.30 |
| S14 | I | 12.90 | 1.60 | 0.36 | 1.04 | 71.80 | 0.40 | 11.00 | 0.98 | 5320.20 | 1554.90 | 83.00 | 11.80 |
| Ⅱ | 12.40 | 1.59 | 0.33 | 1.06 | 70.10 | 0.40 | 13.10 | 1.02 | 5103.60 | 1357.60 | 82.30 | 11.80 |
| Ⅲ | 12.30 | 1.54 | 0.33 | 1.01 | 68.30 | 0.41 | 14.30 | 0.98 | 5213.40 | 1435.60 | 80.30 | 11.90 |
| S15 | I | 14.20 | 2.85 | 0.44 | 1.51 | 70.70 | 0.29 | 13.30 | 0.99 | 3067.50 | 1823.60 | 74.70 | 14.30 |
| Ⅱ | 14.10 | 2.94 | 0.46 | 1.46 | 69.50 | 0.30 | 10.40 | 0.91 | 3081.70 | 1816.40 | 74.70 | 14.30 |
| Ⅲ | 14.60 | 2.83 | 0.44 | 1.58 | 66.10 | 0.29 | 13.10 | 0.99 | 3121.50 | 1780.90 | 72.20 | 13.30 |
| S16 | I | 8.87 | 2.45 | 0.30 | 0.57 | 75.20 | 0.32 | 12.30 | 0.72 | 2212.30 | 1637.10 | 59.50 | 27.10 |
| Ⅱ | 9.00 | 2.26 | 0.32 | 0.52 | 74.90 | 0.37 | 11.90 | 0.74 | 1970.80 | 1607.40 | 58.80 | 28.90 |
| Ⅲ | 9.00 | 2.26 | 0.32 | 0.52 | 74.90 | 0.37 | 11.90 | 0.74 | 2410.30 | 1633.60 | 56.20 | 27.00 |
| S17 | I | 12.40 | 3.03 | 0.49 | 1.16 | 76.20 | 0.29 | 5.74 | 0.66 | 3972.50 | 964.90 | 51.40 | 13.20 |
| Ⅱ | 12.90 | 2.99 | 0.48 | 1.41 | 73.60 | 0.27 | 7.71 | 0.64 | 4414.70 | 906.40 | 50.90 | 12.90 |
| Ⅲ | 12.80 | 3.00 | 0.47 | 1.41 | 73.00 | 0.27 | 8.37 | 0.64 | 4240.80 | 1000.20 | 50.90 | 12.90 |
| S18 | I | 16.30 | 1.80 | 0.38 | 1.62 | 66.80 | 0.30 | 12.10 | 0.68 | 1739.30 | 1525.30 | 42.50 | 17.40 |
| Ⅱ | 17.00 | 1.63 | 0.34 | 2.58 | 63.40 | 0.27 | 14.10 | 0.64 | 1705.70 | 1677.20 | 42.00 | 17.30 |
| Ⅲ | 17.30 | 1.57 | 0.33 | 2.92 | 62.50 | 0.25 | 14.40 | 0.61 | 1569.80 | 1619.30 | 40.20 | 17.90 |
| S19 | I | 13.20 | 3.45 | 0.54 | 0.64 | 69.30 | 0.25 | 11.60 | 0.99 | 8420.50 | 967.60 | 388.00 | 13.50 |
| Ⅱ | 14.20 | 3.14 | 0.46 | 0.90 | 66.60 | 0.24 | 13.50 | 0.94 | 7965.80 | 879.70 | 370.00 | 13.70 |
| Ⅲ | 14.40 | 2.92 | 0.42 | 1.18 | 66.70 | 0.23 | 13.30 | 0.83 | 7310.10 | 860.90 | 368.10 | 14.30 |
| S20 | I | 13.10 | 1.67 | 0.32 | 1.61 | 66.40 | 0.31 | 17.50 | 0.73 | 8818.90 | 1399.10 | 143.00 | 17.30 |
| Ⅱ | 13.70 | 1.71 | 0.33 | 1.65 | 65.10 | 0.35 | 16.40 | 0.74 | 8727.10 | 1378.80 | 142.90 | 17.30 |
| Ⅲ | 13.30 | 1.63 | 0.32 | 1.62 | 63.60 | 0.35 | 18.40 | 0.75 | 9471.60 | 1354.40 | 143.00 | 17.30 |
| S21 | I | 11.40 | 2.50 | 0.43 | 0.66 | 69.80 | 0.30 | 14.40 | 0.55 | 4753.60 | 1981.80 | 81.30 | 17.00 |
| Ⅱ | 11.70 | 2.55 | 0.42 | 0.79 | 68.00 | 0.30 | 15.70 | 0.55 | 4872.10 | 1763.80 | 81.40 | 16.90 |
| Ⅲ | 12.00 | 2.48 | 0.39 | 0.86 | 64.20 | 0.27 | 19.20 | 0.57 | 4786.30 | 1947.00 | 80.80 | 17.00 |
| S22 | I | 14.30 | 1.64 | 0.32 | 1.84 | 71.90 | 0.29 | 9.17 | 0.53 | 2980.40 | 1328.50 | 77.90 | 20.60 |
| Ⅱ | 14.29 | 1.61 | 0.32 | 1.82 | 69.30 | 0.30 | 9.09 | 0.62 | 3209.30 | 1300.20 | 76.90 | 20.00 |
| Ⅲ | 14.31 | 1.62 | 0.36 | 1.89 | 67.10 | 0.28 | 8.90 | 0.58 | 3123.30 | 1298.30 | 74.90 | 19.20 |
| S23 | I | 15.20 | 2.17 | 0.40 | 1.32 | 68.60 | 0.26 | 11.20 | 0.83 | 1695.70 | 1600.90 | 116.00 | 12.00 |
| Ⅱ | 15.20 | 2.23 | 0.40 | 1.38 | 68.60 | 0.26 | 11.20 | 0.77 | 1526.60 | 1478.60 | 114.80 | 12.30 |
| Ⅲ | 14.50 | 2.18 | 0.35 | 1.39 | 69.60 | 0.26 | 11.10 | 0.66 | 2089.70 | 1284.50 | 114.80 | 12.00 |
| S24 | I | 15.90 | 1.97 | 0.38 | 1.98 | 70.60 | 0.27 | 8.18 | 0.76 | 6875.30 | 1471.50 | 77.40 | 22.90 |
| Ⅱ | 16.30 | 1.86 | 0.36 | 2.32 | 69.60 | 0.26 | 8.59 | 0.76 | 7737.10 | 1294.10 | 76.80 | 22.10 |
| Ⅲ | 17.20 | 2.00 | 0.33 | 2.73 | 66.40 | 0.22 | 10.40 | 0.66 | 7261.00 | 1232.20 | 76.00 | 22.30 |
| S25 | I | 15.20 | 1.82 | 0.30 | 1.02 | 69.60 | 0.27 | 11.00 | 0.81 | 7102.10 | 729.00 | 123.00 | 16.90 |
| Ⅱ | 15.21 | 1.81 | 0.32 | 1.10 | 68.45 | 0.28 | 11.23 | 0.79 | 6726.10 | 892.70 | 122.90 | 17.10 |
| Ⅲ | 15.19 | 1.82 | 0.31 | 1.07 | 66.26 | 0.28 | 10.23 | 0.82 | 7526.30 | 817.20 | 122.60 | 15.00 |
| S26 | I | 14.91 | 2.21 | 0.32 | 1.56 | 65.30 | 0.28 | 16.70 | 0.87 | 2210.80 | 1428.30 | 86.10 | 14.70 |
| Ⅱ | 14.89 | 2.23 | 0.33 | 1.58 | 65.40 | 0.27 | 16.90 | 0.98 | 2173.00 | 1384.00 | 85.30 | 14.70 |
| Ⅲ | 14.90 | 2.22 | 0.33 | 1.54 | 63.00 | 0.28 | 16.80 | 0.85 | 1882.30 | 1540.70 | 84.50 | 14.80 |
| S27 | I | 14.30 | 2.87 | 0.51 | 1.07 | 75.50 | 0.33 | 4.70 | 0.80 | 3213.00 | 1306.60 | 85.90 | 23.70 |
| Ⅱ | 14.90 | 2.73 | 0.48 | 1.36 | 74.20 | 0.32 | 5.19 | 0.84 | 3393.20 | 1353.80 | 85.90 | 23.70 |
| Ⅲ | 15.40 | 2.66 | 0.46 | 1.60 | 72.80 | 0.31 | 5.96 | 0.83 | 3285.80 | 1334.90 | 84.60 | 23.70 |
| S28 | I | 14.70 | 2.38 | 0.44 | 1.63 | 67.50 | 0.28 | 12.10 | 1.04 | 2186.20 | 1856.50 | 128.00 | 24.30 |
| Ⅱ | 14.60 | 2.43 | 0.42 | 1.66 | 67.70 | 0.29 | 11.90 | 1.02 | 2965.30 | 1870.40 | 127.70 | 24.20 |
| Ⅲ | 15.40 | 2.33 | 0.42 | 1.85 | 64.10 | 0.29 | 14.40 | 1.11 | 3796.40 | 2109.60 | 125.20 | 23.10 |
| S29 | I | 13.60 | 1.87 | 0.28 | 1.79 | 75.70 | 0.26 | 5.81 | 0.67 | 3174.20 | 1201.80 | 127.00 | 30.40 |
| Ⅱ | 13.70 | 1.88 | 0.29 | 1.80 | 74.91 | 0.28 | 5.23 | 0.66 | 3352.10 | 1167.90 | 125.30 | 29.90 |
| Ⅲ | 13.70 | 1.90 | 0.30 | 1.82 | 74.23 | 0.28 | 5.89 | 0.69 | 3256.20 | 1234.30 | 125.30 | 30.40 |
| S30 | I | 14.50 | 2.02 | 0.36 | 1.29 | 71.60 | 0.27 | 8.92 | 1.03 | 2874.50 | 1337.40 | 52.50 | 17.90 |
| Ⅱ | 14.70 | 2.08 | 0.32 | 1.52 | 69.70 | 0.23 | 10.50 | 0.90 | 1864.40 | 1063.90 | 50.30 | 18.20 |
| Ⅲ | 15.60 | 2.75 | 0.31 | 1.88 | 65.20 | 0.20 | 13.30 | 0.76 | 3355.60 | 879.20 | 50.20 | 17.90 |
| S31 | I | 12.20 | 2.39 | 0.34 | 1.10 | 79.70 | 0.25 | 3.29 | 0.74 | 914.60 | 1344.60 | 75.10 | 16.10 |
| Ⅱ | 12.50 | 2.82 | 0.34 | 1.24 | 78.40 | 0.24 | 3.76 | 0.71 | 2754.00 | 1348.80 | 75.00 | 14.30 |
| Ⅲ | 12.60 | 3.47 | 0.33 | 1.22 | 77.10 | 0.22 | 4.38 | 0.64 | 6969.20 | 1128.60 | 74.70 | 12.20 |
| S32 | I | 17.00 | 1.97 | 0.40 | 2.08 | 68.00 | 0.33 | 9.52 | 0.73 | 1231.20 | 1272.90 | 80.70 | 19.60 |
| Ⅱ | 16.90 | 1.90 | 0.39 | 2.15 | 66.50 | 0.33 | 11.10 | 0.67 | 2119.20 | 1151.60 | 79.99 | 19.32 |
| Ⅲ | 16.60 | 1.93 | 0.36 | 2.11 | 65.80 | 0.29 | 12.40 | 0.61 | 2902.40 | 1069.70 | 79.01 | 18.82 |
| S33 | I | 12.10 | 1.80 | 0.38 | 0.50 | 76.80 | 0.46 | 7.07 | 0.84 | 5333.50 | 1156.60 | 89.90 | 15.00 |
| Ⅱ | 11.40 | 1.70 | 0.34 | 0.51 | 75.80 | 0.44 | 9.02 | 0.78 | 4681.50 | 1101.70 | 89.63 | 15.20 |
| Ⅲ | 11.70 | 1.89 | 0.36 | 0.51 | 73.20 | 0.45 | 11.00 | 0.88 | 4153.70 | 1290.90 | 88.92 | 15.58 |
| S34 | I | 15.10 | 2.49 | 0.44 | 1.69 | 69.10 | 0.28 | 10.00 | 0.92 | 683.20 | 1805.90 | 43.10 | 15.80 |
| Ⅱ | 14.40 | 2.34 | 0.40 | 1.62 | 69.30 | 0.29 | 10.70 | 0.95 | 1447.80 | 1724.50 | 42.90 | 14.98 |
| Ⅲ | 15.50 | 2.32 | 0.40 | 1.86 | 63.40 | 0.28 | 15.10 | 1.10 | 3449.40 | 2099.50 | 42.89 | 13.20 |
| S35 | I | 13.80 | 1.57 | 0.34 | 1.10 | 71.30 | 0.37 | 10.70 | 0.81 | 1132.30 | 1552.50 | 78.80 | 14.40 |
| Ⅱ | 14.10 | 1.75 | 0.34 | 1.26 | 69.90 | 0.33 | 11.60 | 0.78 | 1006.80 | 1479.40 | 77.76 | 14.45 |
| Ⅲ | 14.40 | 2.37 | 0.32 | 1.53 | 66.10 | 0.28 | 14.20 | 0.76 | 1539.80 | 1520.30 | 76.60 | 14.41 |
| S36 | I | 15.00 | 1.61 | 0.30 | 1.50 | 68.70 | 0.27 | 11.70 | 0.91 | 722.60 | 1132.50 | 80.30 | 16.30 |
| Ⅱ | 15.10 | 1.61 | 0.29 | 1.92 | 67.60 | 0.26 | 12.40 | 0.87 | 1128.80 | 1095.50 | 80.10 | 16.00 |
| Ⅲ | 15.20 | 1.94 | 0.28 | 2.20 | 66.30 | 0.23 | 12.90 | 0.91 | 1026.40 | 1078.70 | 78.20 | 16.01 |
| S37 | I | 14.50 | 2.84 | 0.46 | 1.06 | 70.00 | 0.25 | 10.30 | 0.65 | 544.30 | 1035.40 | 76.40 | 17.60 |
| Ⅱ | 15.50 | 2.78 | 0.44 | 1.29 | 67.80 | 0.24 | 11.40 | 0.64 | 695.00 | 1169.80 | 75.60 | 17.54 |
| Ⅲ | 16.40 | 2.85 | 0.46 | 1.51 | 65.90 | 0.25 | 11.80 | 0.83 | 1642.30 | 1493.30 | 74.90 | 16.60 |
| S38 | I | 10.40 | 3.21 | 0.47 | 0.50 | 78.90 | 0.39 | 6.92 | 0.77 | 3276.10 | 1312.20 | 80.60 | 18.80 |
| Ⅱ | 10.60 | 3.28 | 0.49 | 0.51 | 78.10 | 0.41 | 5.81 | 0.76 | 4398.60 | 1251.80 | 80.50 | 18.30 |
| Ⅲ | 10.90 | 3.18 | 0.48 | 0.56 | 76.60 | 0.40 | 6.99 | 0.86 | 7332.80 | 1349.90 | 78.80 | 17.20 |
| S39 | I | 13.20 | 2.35 | 0.37 | 1.20 | 78.40 | 0.27 | 3.32 | 0.80 | 3971.50 | 1460.30 | 44.50 | 14.80 |
| Ⅱ | 13.10 | 2.53 | 0.36 | 1.27 | 78.30 | 0.26 | 3.40 | 0.77 | 5599.60 | 1396.20 | 44.20 | 14.20 |
| Ⅲ | 13.00 | 3.05 | 0.34 | 1.37 | 76.90 | 0.23 | 4.40 | 0.72 | 7523.90 | 1326.70 | 43.50 | 13.40 |
| S40 | I | 15.20 | 2.09 | 0.45 | 1.65 | 72.80 | 0.34 | 6.63 | 0.90 | 1423.10 | 1627.90 | 84.50 | 23.90 |
| Ⅱ | 15.80 | 1.83 | 0.39 | 2.50 | 68.70 | 0.30 | 9.64 | 0.84 | 1660.50 | 1642.00 | 83.90 | 23.90 |
| Ⅲ | 15.90 | 1.85 | 0.45 | 2.42 | 68.10 | 0.30 | 6.98 | 0.90 | 1782.10 | 1621.30 | 81.90 | 23.70 |
| S41 | I | 14.00 | 1.54 | 0.31 | 0.73 | 74.30 | 0.37 | 7.55 | 1.17 | 1363.90 | 1192.20 | 56.30 | 42.30 |
| Ⅱ | 14.00 | 1.50 | 0.30 | 0.78 | 73.80 | 0.36 | 8.08 | 1.11 | 1341.20 | 1225.50 | 56.20 | 42.40 |
| Ⅲ | 13.50 | 1.49 | 0.26 | 0.82 | 74.50 | 0.32 | 8.15 | 0.90 | 1466.80 | 1022.00 | 55.80 | 42.20 |
| S42 | I | 11.30 | 2.58 | 0.45 | 0.76 | 79.70 | 0.32 | 4.39 | 0.48 | 4395.90 | 947.00 | 94.50 | 1.90 |
| Ⅱ | 11.80 | 2.63 | 0.42 | 0.88 | 78.60 | 0.31 | 4.96 | 0.44 | 7401.50 | 830.30 | 94.50 | 1.80 |
| Ⅲ | 12.30 | 2.60 | 0.44 | 1.02 | 76.80 | 0.32 | 5.89 | 0.58 | 7274.80 | 1216.30 | 94.30 | 1.80 |
| S43 | I | 13.00 | 2.28 | 0.43 | 0.82 | 74.50 | 0.34 | 7.35 | 1.23 | 3869.20 | 1417.60 | 80.50 | 14.60 |
| Ⅱ | 12.20 | 2.26 | 0.38 | 0.80 | 75.80 | 0.35 | 7.08 | 1.09 | 7051.90 | 1264.00 | 78.90 | 13.90 |
| Ⅲ | 12.50 | 2.19 | 0.37 | 0.87 | 74.10 | 0.33 | 8.53 | 1.14 | 7563.80 | 1283.80 | 77.20 | 13.00 |
| S44 | I | 14.30 | 2.84 | 0.48 | 1.63 | 76.00 | 0.28 | 3.73 | 0.77 | 5583.30 | 1335.10 | 51.40 | 18.20 |
| Ⅱ | 14.20 | 2.81 | 0.47 | 1.64 | 75.50 | 0.27 | 3.71 | 0.76 | 5629.20 | 1382.70 | 51.00 | 18.10 |
| Ⅲ | 14.40 | 2.87 | 0.47 | 1.69 | 74.98 | 0.28 | 3.65 | 0.77 | 5819.00 | 1213.10 | 49.90 | 18.20 |
| S45 | I | 14.70 | 1.58 | 0.31 | 1.42 | 66.10 | 0.32 | 14.60 | 0.95 | 3001.30 | 1964.50 | 93.20 | 29.30 |
| Ⅱ | 14.10 | 1.64 | 0.35 | 1.38 | 65.20 | 0.32 | 13.20 | 0.98 | 3212.30 | 1910.00 | 92.10 | 29.30 |
| Ⅲ | 14.60 | 1.61 | 0.32 | 1.40 | 66.20 | 0.34 | 13.50 | 0.92 | 4562.30 | 1632.60 | 91.00 | 28.90 |
| S46 | I | 11.10 | 2.60 | 0.40 | 0.65 | 77.70 | 0.33 | 6.30 | 0.97 | 5360.50 | 1885.10 | 51.70 | 17.80 |
| Ⅱ | 10.40 | 2.82 | 0.39 | 0.58 | 77.90 | 0.33 | 6.74 | 0.85 | 5616.30 | 1844.30 | 51.70 | 17.80 |
| Ⅲ | 10.40 | 3.01 | 0.38 | 0.61 | 76.30 | 0.33 | 8.11 | 0.86 | 7235.10 | 1694.40 | 50.80 | 17.80 |
| S47 | I | 13.60 | 3.26 | 0.48 | 1.42 | 74.70 | 0.26 | 5.50 | 0.73 | 6247.50 | 1438.60 | 45.70 | 13.90 |
| Ⅱ | 14.10 | 3.24 | 0.45 | 1.55 | 74.30 | 0.25 | 5.39 | 0.66 | 7449.90 | 1265.00 | 45.50 | 13.60 |
| Ⅲ | 14.60 | 3.60 | 0.44 | 1.94 | 71.40 | 0.22 | 7.06 | 0.69 | 7785.20 | 1281.70 | 45.00 | 13.60 |
| S48 | I | 16.20 | 2.40 | 0.43 | 1.42 | 65.80 | 0.27 | 12.70 | 0.71 | 1896.30 | 1460.20 | 248.00 | 49.60 |
| Ⅱ | 16.00 | 2.63 | 0.48 | 1.19 | 68.10 | 0.29 | 10.60 | 0.74 | 1840.30 | 1468.90 | 247.50 | 49.60 |
| Ⅲ | 15.80 | 2.43 | 0.41 | 1.45 | 66.40 | 0.25 | 12.60 | 0.62 | 2247.10 | 1244.00 | 245.00 | 49.00 |
| S49 | I | 12.40 | 2.45 | 0.37 | 1.03 | 79.40 | 0.26 | 3.34 | 0.76 | 5107.60 | 1374.20 | 77.70 | 16.80 |
| Ⅱ | 12.50 | 3.35 | 0.39 | 1.11 | 77.20 | 0.24 | 4.43 | 0.76 | 7066.40 | 1397.50 | 77.00 | 16.20 |
| Ⅲ | 12.70 | 3.82 | 0.36 | 1.17 | 75.80 | 0.23 | 5.18 | 0.70 | 7638.20 | 1261.50 | 75.10 | 16.30 |
| S50 | I | 15.20 | 1.78 | 0.33 | 1.32 | 69.70 | 0.27 | 10.50 | 1.00 | 2398.30 | 1401.40 | 74.20 | 21.70 |
| Ⅱ | 14.90 | 1.80 | 0.29 | 1.72 | 69.60 | 0.25 | 10.60 | 0.79 | 1882.10 | 1047.90 | 74.00 | 22.10 |
| Ⅲ | 15.10 | 2.16 | 0.31 | 2.00 | 68.30 | 0.24 | 11.00 | 0.94 | 2146.10 | 1392.40 | 73.80 | 21.70 |
| S51 | I | 13.60 | 1.70 | 0.30 | 1.63 | 70.70 | 0.25 | 11.90 | 0.70 | 1865.90 | 1351.20 | 54.70 | 19.50 |
| Ⅱ | 13.00 | 2.23 | 0.37 | 0.58 | 70.20 | 0.34 | 12.40 | 0.83 | 1227.30 | 1283.80 | 54.50 | 20.10 |
| Ⅲ | 13.00 | 1.80 | 0.31 | 0.81 | 65.90 | 0.32 | 15.10 | 0.68 | 1035.30 | 1139.60 | 53.40 | 20.40 |
| S52 | I | 13.60 | 3.42 | 0.50 | 1.01 | 72.60 | 0.29 | 7.55 | 0.98 | 2399.30 | 2230.30 | 118.00 | 26.20 |
| Ⅱ | 13.40 | 3.50 | 0.49 | 0.99 | 72.60 | 0.28 | 7.83 | 0.88 | 2528.50 | 1989.10 | 117.80 | 26.20 |
| Ⅲ | 13.60 | 3.58 | 0.46 | 1.00 | 71.60 | 0.25 | 8.63 | 0.86 | 2575.70 | 1882.10 | 117.60 | 26.20 |
| S53 | I | 13.40 | 2.40 | 0.44 | 0.76 | 74.00 | 0.32 | 7.97 | 0.64 | 3110.10 | 1464.20 | 42.30 | 22.60 |
| Ⅱ | 14.00 | 2.46 | 0.42 | 0.90 | 72.10 | 0.29 | 9.22 | 0.56 | 3802.50 | 1308.50 | 42.00 | 22.20 |
| Ⅲ | 14.20 | 2.54 | 0.41 | 0.95 | 71.10 | 0.27 | 9.94 | 0.55 | 4182.50 | 1139.50 | 41.80 | 21.80 |
| S54 | I | 14.10 | 1.98 | 0.36 | 1.96 | 70.90 | 0.29 | 9.59 | 0.77 | 4883.30 | 2176.30 | 46.10 | 29.30 |
| Ⅱ | 15.80 | 1.53 | 0.31 | 2.93 | 68.70 | 0.28 | 9.64 | 0.89 | 5020.00 | 2531.90 | 46.10 | 29.20 |
| Ⅲ | 16.40 | 1.50 | 0.31 | 3.44 | 66.30 | 0.26 | 10.90 | 0.91 | 5747.00 | 2654.00 | 45.80 | 29.00 |
| S55 | I | 13.20 | 2.20 | 0.30 | 1.09 | 64.40 | 0.24 | 19.10 | 0.98 | 2231.10 | 1945.20 | 73.60 | 37.50 |
| Ⅱ | 13.50 | 1.98 | 0.30 | 1.16 | 63.30 | 0.23 | 19.60 | 0.99 | 2214.90 | 1934.10 | 73.60 | 37.50 |
| Ⅲ | 13.60 | 1.99 | 0.31 | 1.11 | 61.20 | 0.24 | 20.50 | 1.02 | 1974.20 | 2108.00 | 73.40 | 37.60 |
| S56 | I | 16.20 | 1.77 | 0.35 | 1.79 | **61.40** | 0.24 | 17.20 | 1.14 | 8258.10 | 1712.70 | 45.60 | 15.80 |
| Ⅱ | 16.60 | 1.79 | 0.34 | 2.22 | 60.10 | 0.24 | 17.70 | 1.13 | 8934.50 | 1848.10 | 44.90 | 15.70 |
| Ⅲ | 18.00 | 1.81 | 0.32 | 3.32 | 55.70 | 0.20 | 19.40 | 1.13 | 11209.00 | 1688.00 | 44.80 | 13.20 |
| S57 | I | 13.40 | 1.58 | 0.33 | 0.66 | 74.00 | 0.37 | 8.38 | 1.29 | 3252.30 | 1712.80 | 48.60 | 61.50 |
| Ⅱ | 13.50 | 1.56 | 0.31 | 0.74 | 72.80 | 0.36 | 9.58 | 1.19 | 2937.80 | 1537.40 | 48.40 | 61.60 |
| Ⅲ | 13.80 | 1.49 | 0.29 | 0.76 | 70.00 | 0.36 | 12.20 | 1.10 | 2456.50 | 1482.50 | 48.20 | 62.00 |
| S58 | I | 15.10 | 2.58 | 0.45 | 1.47 | 67.00 | 0.27 | 12.50 | 0.62 | 10698.00 | 1266.30 | 104.00 | 19.90 |
| Ⅱ | 15.20 | 2.68 | 0.46 | 1.28 | 67.20 | 0.28 | 12.30 | 0.65 | 10213.90 | 1351.20 | 102.80 | 19.90 |
| Ⅲ | 17.20 | 2.50 | 0.31 | 2.27 | 57.30 | 0.20 | 19.20 | 0.96 | 2563.80 | 1373.20 | 110.70 | 23.30 |
| S59 | I | 14.20 | 2.21 | 0.43 | 0.92 | 68.00 | 0.31 | 13.20 | 0.78 | 4460.00 | 2405.30 | 84.20 | 18.20 |
| Ⅱ | 14.70 | 2.03 | 0.39 | 1.08 | 65.70 | 0.30 | 14.90 | 0.80 | 4701.30 | 2374.80 | 84.00 | 18.10 |
| Ⅲ | 15.60 | 2.05 | 0.39 | 1.39 | 61.30 | 0.28 | 18.10 | 0.86 | 4156.50 | 2418.60 | 83.20 | 18.30 |
| S60 | I | 14.70 | 3.02 | 0.56 | 1.76 | 67.20 | 0.28 | 11.60 | 0.86 | 9115.10 | 2136.30 | 71.70 | 9.00 |
| Ⅱ | 16.40 | 2.79 | 0.48 | 2.47 | 59.80 | 0.22 | 17.00 | 0.82 | 11373.40 | 2152.90 | 70.08 | 8.80 |
| Ⅲ | 17.80 | 2.74 | 0.46 | 2.96 | 53.60 | 0.21 | 21.30 | 0.90 | 11093.10 | 2422.40 | 69.90 | 8.80 |
| S61 | I | 13.10 | 1.54 | 0.33 | 1.16 | 67.60 | 0.40 | 14.80 | 1.16 | 5234.90 | 1745.10 | 76.40 | 13.10 |
| Ⅱ | 13.10 | 1.51 | 0.34 | 1.06 | 69.00 | 0.41 | 13.50 | 1.04 | 5978.70 | 1751.50 | 75.80 | 13.00 |
| Ⅲ | 14.00 | 1.60 | 0.35 | 1.31 | 64.40 | 0.37 | 16.60 | 1.34 | 5786.70 | 2121.20 | 74.90 | 13.00 |
| S62 | I | 13.60 | 1.85 | 0.36 | 1.13 | 70.90 | 0.35 | 11.00 | 0.83 | 7416.20 | 1018.60 | 78.50 | 17.50 |
| Ⅱ | 13.50 | 1.79 | 0.33 | 1.23 | 68.40 | 0.34 | 13.60 | 0.88 | 8018.50 | 1149.40 | 78.00 | 16.90 |
| Ⅲ | 13.60 | 1.99 | 0.32 | 1.26 | 65.10 | 0.31 | 16.40 | 0.92 | 7243.80 | 1261.20 | 76.80 | 17.60 |
| S63 | I | 11.10 | 2.58 | 0.50 | 0.82 | 80.00 | 0.37 | 3.93 | 0.74 | 2448.20 | 1020.00 | 72.90 | 27.30 |
| Ⅱ | 11.12 | 2.54 | 0.50 | 0.87 | 77.94 | 0.37 | 4.68 | 0.79 | 2434.70 | 1134.40 | 72.30 | 27.30 |
| Ⅲ | 11.26 | 2.58 | 0.51 | 0.89 | 76.40 | 0.37 | 4.87 | 0.80 | 2633.20 | 1243.60 | 72.40 | 27.20 |
| S64 | I | 15.60 | 1.89 | 0.37 | 1.72 | 69.20 | 0.27 | 9.98 | 0.93 | 1606.50 | 1552.60 | 119.00 | 36.00 |
| Ⅱ | 15.10 | 1.91 | 0.35 | 1.59 | 69.60 | 0.26 | 10.30 | 0.88 | 1614.40 | 1552.00 | 118.80 | 36.00 |
| Ⅲ | 15.40 | 1.95 | 0.33 | 1.75 | 67.10 | 0.24 | 12.60 | 0.76 | 1849.00 | 1311.30 | 116.70 | 35.80 |
| S65 | I | 13.30 | 2.30 | 0.40 | 0.69 | 66.40 | 0.33 | 15.90 | 0.70 | 6096.90 | 1221.90 | 47.80 | 17.90 |
| Ⅱ | 13.50 | 2.31 | 0.41 | 0.78 | 66.60 | 0.33 | 15.40 | 0.76 | 5432.70 | 1546,7 | 47.80 | 17.90 |
| Ⅲ | 13.90 | 2.35 | 0.40 | 0.68 | 62.50 | 0.33 | 19.00 | 0.87 | 4242.80 | 1549.30 | 46.40 | 18.00 |
| S66 | I | 15.00 | 2.33 | 0.32 | 3.03 | 63.50 | 0.23 | 14.80 | 0.88 | 8886.60 | 1698.80 | 88.80 | 19.40 |
| Ⅱ | 17.00 | 1.86 | 0.33 | 3.95 | 59.10 | 0.20 | 14.98 | 0.92 | 7856.90 | 2247.00 | 88.60 | 19.90 |
| Ⅲ | 17.80 | 1.90 | 0.32 | 4.21 | **51.90** | 0.19 | 22.50 | 1.18 | 7608.60 | 2212.50 | 88.20 | 19.90 |
| S67 | I | 14.40 | 1.92 | 0.38 | 1.41 | 72.10 | 0.30 | 8.65 | 0.81 | 2069.00 | 1884.80 | 83.10 | 28.40 |
| Ⅱ | 14.30 | 1.92 | 0.35 | 1.60 | 71.30 | 0.26 | 9.61 | 0.68 | 1509.00 | 1665.90 | 82.80 | 28.60 |
| Ⅲ | 15.60 | 1.82 | 0.36 | 2.04 | 68.00 | 0.26 | 11.00 | 0.97 | 1446.10 | 2072.70 | 82.00 | 28.70 |
| S68 | I | 12.30 | 1.84 | 0.39 | 1.19 | 77.30 | 0.38 | 6.01 | 0.65 | 4207.90 | 1482.20 | 92.00 | 10.50 |
| Ⅱ | 12.60 | 2.03 | 0.37 | 1.54 | 72.90 | 0.34 | 9.38 | 0.76 | 4137.30 | 1740.00 | 91.00 | 10.50 |
| Ⅲ | 13.40 | 2.12 | 0.35 | 1.74 | 68.60 | 0.30 | 12.70 | 0.74 | 4471.60 | 1629.90 | 89.30 | 10.50 |
| S69 | I | 12.70 | 2.19 | 0.42 | 0.87 | 77.60 | 0.33 | 5.18 | 0.77 | 5051.70 | 1016.50 | 75.80 | 20.70 |
| Ⅱ | 12.50 | 2.28 | 0.41 | 0.88 | 77.60 | 0.32 | 5.26 | 0.71 | 5203.00 | 986.00 | 75.60 | 20.70 |
| Ⅲ | 12.70 | 2.47 | 0.45 | 0.92 | 76.10 | 0.32 | 6.20 | 0.85 | 5451.50 | 1189.60 | 75. 50 | 20.20 |
| S70 | I | 11.90 | 3.02 | 0.49 | 0.94 | 77.00 | 0.29 | 5.68 | 0.67 | 5273.30 | 1287.50 | 59.30 | 25.30 |
| Ⅱ | 12.70 | 3.09 | 0.49 | 1.16 | 72.90 | 0.28 | 8.64 | 0.73 | 4372.00 | 1321.40 | 59.00 | 24.80 |
| Ⅲ | 12.90 | 3.05 | 0.46 | 1.28 | 71.80 | 0.26 | 9.64 | 0.67 | 4179.60 | 1209.30 | 58.40 | 24.60 |
| S71 | I | 15.20 | 1.93 | 0.37 | 1.72 | 67.10 | 0.27 | 12.60 | 0.83 | 6340.50 | 1779.80 | 274.00 | 18.00 |
| Ⅱ | 16.20 | 1.84 | 0.35 | 2.41 | 62.60 | 0.25 | 15.50 | 0.86 | 7741.50 | 1888.40 | 273.60 | 17.90 |
| Ⅲ | 17.40 | 1.77 | 0.34 | 2.99 | 58.50 | 0.23 | 18.00 | 0.81 | 8691.60 | 1841.20 | 272.60 | 17.60 |
| S72 | I | 11.60 | 1.86 | 0.32 | 0.97 | 76.60 | 0.31 | 4.02 | 0.84 | 2522.30 | 1341.50 | 166.00 | 23.80 |
| Ⅱ | 11.40 | 1.80 | 0.35 | 0.94 | 75.40 | 0.32 | 4.42 | 0.83 | 2442.80 | 1452.40 | 165.80 | 23.80 |
| Ⅲ | 11.70 | 1.88 | 0.32 | 0.98 | 74.80 | 0.31 | 4.21 | 0.84 | 2485.90 | 1443.50 | 164.40 | 22.90 |
| S73 | I | 12.60 | 3.21 | 0.44 | 0.72 | 73.50 | 0.28 | 8.47 | 0.83 | 3353.20 | 1783.70 | 160.00 | 22.00 |
| Ⅱ | 12.30 | 3.46 | 0.43 | 0.77 | 72.00 | 0.27 | 9.95 | 0.81 | 2916.50 | 1685.00 | 158.80 | 22.20 |
| Ⅲ | 12.90 | 4.05 | 0.43 | 0.95 | 67.70 | 0.25 | 13.00 | 0.77 | 2581.80 | 1533.40 | 158.40 | 22.20 |
| S74 | I | 11.00 | 2.47 | 0.41 | 0.53 | 73.30 | 0.37 | 11.00 | 0.99 | 3318.10 | 1772.30 | 82.50 | 17.20 |
| Ⅱ | 10.50 | 2.33 | 0.37 | 0.61 | 73.20 | 0.36 | 11.70 | 0.91 | 4077.00 | 1530.20 | 81.20 | 16.80 |
| Ⅲ | 10.20 | 2.44 | 0.36 | 0.55 | 71.80 | 0.37 | 13.50 | 0.85 | 3918.80 | 1487.30 | 82.00 | 17.00 |
| S75 | I | 13.70 | 2.92 | 0.44 | 1.16 | 72.30 | 0.28 | 8.17 | 1.03 | 2515.20 | 2278.90 | 94.40 | 30.40 |
| Ⅱ | 13.80 | 3.05 | 0.44 | 1.14 | 72.30 | 0.27 | 8.07 | 0.96 | 2769.10 | 2198.30 | 94.00 | 30.30 |
| Ⅲ | 13.60 | 3.07 | 0.42 | 1.13 | 71.30 | 0.26 | 9.24 | 0.94 | 2644.40 | 2015.20 | 92.80 | 30.40 |
| S76 | I | 9.07 | 2.85 | 0.43 | 0.55 | 76.30 | 0.38 | 9.55 | 0.84 | 3213.20 | 2042.30 | 98.30 | 40.60 |
| Ⅱ | 8.87 | 2.84 | 0.42 | 0.53 | 75.20 | 0.39 | 10.90 | 0.84 | 3083.50 | 1864.20 | 98.00 | 40.60 |
| Ⅲ | 8.88 | 3.86 | 0.44 | 0.64 | 72.10 | 0.38 | 12.90 | 0.80 | 2443.10 | 1858.70 | 96.60 | 42.10 |
| S77 | I | 13.80 | 1.90 | 0.29 | 0.98 | 61.50 | 0.24 | 20.34 | 0.98 | 1322.40 | 1986.00 | 77.70 | 38.70 |
| Ⅱ | 14.30 | 1.93 | 0.30 | 1.14 | **58.90** | 0.23 | 22.01 | 1.03 | 1354.40 | 1867.70 | 77.20 | 38.70 |
| Ⅲ | 14.10 | 1.93 | 0.30 | 1.13 | 56.20 | 0.24 | 23.01 | 1.12 | 1261.50 | 2004.80 | 77.20 | 38.80 |
| S78 | I | 8.86 | 3.49 | 0.39 | 0.70 | 72.80 | 0.33 | 12.60 | 0.77 | 3137.60 | 1894.10 | 75.60 | 43.90 |
| Ⅱ | 8.12 | 3.42 | 0.37 | 0.73 | 70.89 | 0.31 | 13.02 | 0.72 | 3120.40 | 1849.30 | 75.60 | 43.90 |
| Ⅲ | 8.76 | 3.47 | 0.40 | 0.72 | 69.32 | 0.33 | 13.34 | 0.78 | 3467.30 | 1737.20 | 75.40 | 43.90 |
| S79 | I | 12.70 | 2.36 | 0.35 | 0.93 | 73.10 | 0.30 | 9.64 | 0.65 | 2554.80 | 1137.10 | 177.00 | 10.50 |
| Ⅱ | 12.67 | 2.32 | 0.35 | 0.92 | 72.20 | 0.29 | 9.89 | 0.68 | 2621.90 | 1135.60 | 176.60 | 10.50 |
| Ⅲ | 12.72 | 2.34 | 0.33 | 0.92 | 70.11 | 0.30 | 9.24 | 0.69 | 2456.60 | 1136.30 | 175.80 | 10.40 |
| S80 | I | 10.80 | 2.74 | 0.42 | 0.64 | 77.90 | 0.32 | 6.34 | 0.88 | 8288.30 | 1723.30 | 37.10 | 19.50 |
| Ⅱ | 10.30 | 2.75 | 0.39 | 0.60 | 77.30 | 0.34 | 7.39 | 0.89 | 7725.50 | 1920.20 | 37.00 | 19.60 |
| Ⅲ | 10.40 | 2.91 | 0.36 | 0.72 | 74.80 | 0.33 | 9.56 | 0.89 | 9068.70 | 1802.00 | 36.60 | 19.40 |
| S81 | I | 12.70 | 1.94 | 0.34 | 0.79 | 72.40 | 0.32 | 10.60 | 0.93 | 4606.10 | 808.80 | 80.90 | 25.40 |
| Ⅱ | 12.68 | 1.95 | 0.32 | 0.78 | 70.29 | 0.32 | 10.58 | 0.98 | 4524.70 | 1021.10 | 80.40 | 25.40 |
| Ⅲ | 12.71 | 1.91 | 0.32 | 0.79 | 70.20 | 0.34 | 10.62 | 0.95 | 4698.90 | 800.10 | 80.40 | 25.40 |
| S82 | I | 16.90 | 1.59 | 0.31 | 2.98 | 69.60 | 0.30 | 7.39 | 0.95 | 4751.00 | 1677.40 | 81.30 | 21.60 |
| Ⅱ | 15.90 | 1.59 | 0.29 | 2.85 | 69.30 | 0.28 | 8.97 | 0.85 | 4535.10 | 1187.40 | 81.20 | 21.60 |
| Ⅲ | 16.60 | 1.58 | 0.26 | 3.21 | 67.00 | 0.25 | 10.20 | 0.89 | 3865.20 | 1173.40 | 79.60 | 22.20 |
| S83 | I | 13.70 | 1.83 | 0.35 | 1.15 | 71.80 | 0.31 | 10.10 | 0.76 | 2728.90 | 1350.70 | 75.30 | 55.30 |
| Ⅱ | 14.10 | 1.89 | 0.33 | 1.31 | 70.60 | 0.29 | 10.80 | 0.69 | 2423.90 | 1387.50 | 75.20 | 55.30 |
| Ⅲ | 14.60 | 1.85 | 0.30 | 1.52 | 61.20 | 0.24 | 19.40 | 0.95 | 2218.70 | 1996.50 | 74.90 | 55.40 |
| S84 | I | 13.90 | 1.72 | 0.36 | 0.96 | 72.10 | 0.37 | 9.73 | 0.89 | 2566.30 | 1864.70 | 50.10 | 19.60 |
| Ⅱ | 14.20 | 1.75 | 0.34 | 1.39 | 68.90 | 0.32 | 12.30 | 0.83 | 2313.80 | 1737.80 | 50.00 | 19.70 |
| Ⅲ | 14.60 | 2.52 | 0.34 | 1.55 | 64.10 | 0.27 | 15.70 | 0.86 | 2492.20 | 1836.30 | 49.50 | 19.60 |
| S85 | I | 10.00 | 1.69 | 0.27 | 0.92 | 77.30 | 0.27 | 8.79 | 0.73 | 1794.40 | 1155.80 | 76.80 | 22.20 |
| Ⅱ | 12.00 | 1.67 | 0.33 | 1.34 | 71.20 | 0.32 | 11.90 | 1.25 | 1717.20 | 2622.70 | 76.60 | 22.20 |
| Ⅲ | 11.40 | 1.71 | 0.27 | 1.33 | 70.20 | 0.25 | 14.00 | 0.83 | 2708.60 | 1702.10 | 74.90 | 21.70 |
| S86 | I | 13.10 | 1.62 | 0.27 | 1.68 | 77.10 | 0.28 | 5.34 | 0.68 | 3391.50 | 1244.80 | 74.00 | 28.20 |
| Ⅱ | 13.15 | 1.61 | 0.26 | 1.69 | 75.34 | 0.27 | 5.01 | 0.68 | 4309.10 | 1038.30 | 72.80 | 28.00 |
| Ⅲ | 13.56 | 1.60 | 0.28 | 1.61 | 73.11 | 0.27 | 5.23 | 0.66 | 3901.30 | 1223.30 | 72.60 | 28.10 |
| S87 | I | 13.80 | 1.97 | 0.36 | 2.23 | 65.30 | 0.24 | 12.10 | 1.05 | 1199.20 | 1231.20 | 75.60 | 22.00 |
| Ⅱ | 16.20 | 1.97 | 0.36 | 2.59 | 64.60 | 0.24 | 13.00 | 1.05 | 11519.60 | 1373.60 | 75.80 | 22.00 |
| Ⅲ | 13.60 | 2.00 | 0.36 | 1.59 | 64.90 | 0.25 | 7.41 | 0.90 | 14574.30 | 1114.80 | 75.90 | 21.80 |
| S88 | I | 11.70 | 1.95 | 0.37 | 0.47 | 76.40 | 0.44 | 7.85 | 0.83 | 4714.60 | 1115.00 | 126.00 | 16.20 |
| Ⅱ | 11.40 | 2.03 | 0.36 | 0.53 | 76.30 | 0.41 | 8.20 | 0.80 | 5374.30 | 996.60 | 125.40 | 16.00 |
| Ⅲ | 11.90 | 1.98 | 0.36 | 0.52 | 74.30 | 0.43 | 9.67 | 0.87 | 5254.30 | 1181.30 | 125.60 | 16.00 |
| S89 | I | 12.50 | 1.92 | 0.33 | 0.96 | 74.30 | 0.31 | 9.10 | 0.63 | 2485.40 | 1057.90 | 101.00 | 8.60 |
| Ⅱ | 12.51 | 1.90 | 0.34 | 0.97 | 73.21 | 0.31 | 9.19 | 0.65 | 2425.60 | 1034.90 | 100.00 | 8.60 |
| Ⅲ | 12.52 | 1.89 | 0.33 | 0.97 | 72.29 | 0.36 | 9.25 | 0.66 | 2634.90 | 1028.60 | 99.90 | 8.60 |
| S90 | I | 13.61 | 1.96 | 0.30 | 1.51 | 76.48 | 0.30 | 7.69 | 0.83 | 3045.80 | 1624.00 | 91.20 | 25.20 |
| Ⅱ | 13.60 | 1.83 | 0.30 | 1.46 | 76.10 | 0.27 | 5.74 | 0.70 | 3417.10 | 1243.60 | 91.10 | 25.20 |
| Ⅲ | 13.90 | 2.23 | 0.30 | 1.53 | 73.60 | 0.27 | 7.41 | 0.81 | 3075.30 | 1666.20 | 91.20 | 25.20 |
| S91 | I | 14.50 | 2.43 | 0.45 | 1.57 | 74.90 | 0.34 | 5.01 | 0.84 | 4166.20 | 1386.10 | 39.40 | 24.70 |
| Ⅱ | 14.90 | 2.54 | 0.47 | 1.63 | 73.90 | 0.33 | 5.34 | 0.89 | 3886.20 | 1689.40 | 39.40 | 24.80 |
| Ⅲ | 16.20 | 2.53 | 0.45 | 2.36 | 69.10 | 0.30 | 8.15 | 0.90 | 4409.10 | 1785.70 | 39.00 | 24.70 |
| S92 | I | 12.28 | 2.53 | 0.37 | 1.11 | 74.41 | 0.31 | 8.39 | 0.52 | 3139.00 | 1398.10 | 100.00 | 7.20 |
| Ⅱ | 12.32 | 2.52 | 0.37 | 1.12 | 74.56 | 0.30 | 8.34 | 0.53 | 3201.20 | 1298.30 | 99.90 | 7.20 |
| Ⅲ | 12.30 | 2.54 | 0.39 | 1.14 | 71.40 | 0.32 | 8.40 | 0.55 | 3128.60 | 1304.30 | 99.20 | 7.20 |
| S93 | I | 13.90 | 1.95 | 0.31 | 1.67 | 70.00 | 0.31 | 11.10 | 0.76 | 3803.50 | 1629.10 | 87.70 | 23.20 |
| Ⅱ | 13.80 | 1.75 | 0.33 | 1.38 | 70.10 | 0.31 | 11.50 | 0.80 | 2782.30 | 1578.60 | 87.60 | 23.60 |
| Ⅲ | 14.70 | 2.26 | 0.33 | 1.75 | 63.80 | 0.29 | 16.00 | 0.93 | 2697.80 | 1757.30 | 87.40 | 23.60 |
| S94 | I | 13.90 | 2.06 | 0.39 | 1.23 | 76.50 | 0.34 | 4.73 | 0.82 | 7142.30 | 1522.40 | 137.00 | 29.20 |
| Ⅱ | 14.20 | 2.03 | 0.38 | 1.40 | 76.00 | 0.33 | 4.77 | 0.82 | 7425.90 | 1572.10 | 135.90 | 29.10 |
| Ⅲ | 15.10 | 1.98 | 0.36 | 1.89 | 74.80 | 0.31 | 4.82 | 0.79 | 7073.10 | 1493.80 | 134.20 | 29.20 |
| S95 | I | 15.00 | 3.16 | 0.32 | 1.58 | 66.00 | 0.20 | 13.00 | 0.73 | 4763.50 | 978.90 | 373.00 | 16.80 |
| Ⅱ | 14.78 | 3.15 | 0.32 | 1.57 | 66.34 | 0.20 | 11.98 | 0.74 | 4823.10 | 1028.10 | 370.00 | 16.80 |
| Ⅲ | 15.01 | 3.18 | 0.34 | 1.59 | 63.65 | 0.21 | 11.20 | 0.75 | 4961.10 | 990.10 | 369.90 | 16.70 |
| S96 | I | 12.78 | 2.19 | 0.31 | 0.87 | 66.60 | 0.25 | 15.89 | 0.86 | 2078.90 | 1461.70 | 147.00 | 27.60 |
| Ⅱ | 12.80 | 2.25 | 0.37 | 0.88 | 66.20 | 0.27 | 15.43 | 0.88 | 2376.00 | 1658.90 | 145.60 | 27.60 |
| Ⅲ | 12.80 | 2.21 | 0.36 | 0.89 | 67.30 | 0.29 | 15.30 | 0.85 | 2495.40 | 1662.40 | 144.90 | 27.50 |
| S97 | I | 13.40 | 1.83 | 0.28 | 1.30 | 74.90 | 0.26 | 7.31 | 0.68 | 1771.40 | 1239.50 | 48.70 | 29.90 |
| Ⅱ | 13.70 | 1.80 | 0.33 | 1.22 | 74.70 | 0.32 | 6.00 | 0.87 | 4059.40 | 1685.70 | 48.60 | 26.60 |
| Ⅲ | 13.50 | 1.89 | 0.30 | 1.42 | 75.70 | 0.27 | 6.17 | 0.76 | 3821.20 | 1479.90 | 48.40 | 26.90 |
| S98 | I | 13.40 | 2.13 | 0.34 | 0.85 | 68.80 | 0.27 | 13.30 | 0.94 | 10145.10 | 1431.90 | 67.80 | 17.30 |
| Ⅱ | 13.00 | 2.37 | 0.31 | 0.85 | 66.30 | 0.25 | 16.00 | 0.97 | 9955.50 | 1369.10 | 66.60 | 17.30 |
| Ⅲ | 13.00 | 2.62 | 0.30 | 0.93 | 66.50 | 0.24 | 15.60 | 0.86 | 11037.40 | 1230.80 | 64.81 | 17.20 |
| 平均值 |  | **13.69** | **2.27** | **0.37** | **1.33** | **70.28** | **0.30** | **10.66** | **0.82** | **4225.20** | **1448.46** | **91.72** | **21.49** |
| 标准差 |  | **1.92** | **0.53** | **0.06** | **0.63** | **5.38** | **0.05** | **4.29** | **0.16** | **2561.22** | **384.10** | **55.72** | **10.10** |
| 变异系数（%） |  | **14.05** | **23.48** | **16.88** | **47.40** | **7.65** | **17.18** | **40.18** | **19.75** | **60.62** | **26.52** | **60.75** | **47.00** |

**Table S2** Score table of principal component comprehensive evaluation of 98 olive varieties under different maturity levels (Ⅰ ~ Ⅲ)

| **Ⅰ** | | | **Ⅱ** | | | **Ⅲ** | | |
| --- | --- | --- | --- | --- | --- | --- | --- | --- |
| **Rating** | **Score** | **Variety number** | **Rating** | **Score** | **Variety number** | **Rating** | **Score** | **Variety number** |
| 1 | 0.89 | S95 | 1 | 0.95 | S60 | 1 | 1.46 | S60 |
| 2 | 0.85 | S66 | 2 | 0.85 | S66 | 2 | 1.38 | S66 |
| 3 | 0.77 | S56 | 3 | 0.70 | S71 | 3 | 1.14 | S56 |
| 4 | 0.76 | S19 | 4 | 0.68 | S87 | 4 | 1.09 | S9 |
| 5 | 0.75 | S9 | 5 | 0.67 | S19 | 5 | 1.04 | S71 |
| 6 | 0.72 | S48 | 6 | 0.65 | S56 | 6 | 0.95 | S58 |
| 7 | 0.70 | S71 | 7 | 0.62 | S3 | 7 | 0.84 | S59 |
| 8 | 0.65 | S58 | 8 | 0.62 | S95 | 8 | 0.76 | S18 |
| 9 | 0.63 | S60 | 9 | 0.61 | S9 | 9 | 0.75 | S3 |
| 10 | 0.60 | S3 | 10 | 0.59 | S58 | 10 | 0.73 | S34 |
| 11 | 0.55 | S77 | 11 | 0.58 | S11 | 11 | 0.73 | S24 |
| 12 | 0.54 | S11 | 12 | 0.49 | S24 | 12 | 0.72 | S54 |
| 13 | 0.52 | S20 | 13 | 0.48 | S2 | 13 | 0.70 | S8 |
| 14 | 0.52 | S82 | 14 | 0.47 | S47 | 14 | 0.70 | S28 |
| 15 | 0.51 | S26 | 15 | 0.46 | S18 | 15 | 0.70 | S19 |
| 16 | 0.50 | S55 | 16 | 0.45 | S48 | 16 | 0.70 | S55 |
| 17 | 0.50 | S87 | 17 | 0.41 | S37 | 17 | 0.68 | S77 |
| 18 | 0.50 | S28 | 18 | 0.41 | S54 | 18 | 0.67 | S95 |
| 19 | 0.46 | S24 | 19 | 0.41 | S15 | 19 | 0.65 | S37 |
| 20 | 0.44 | S64 | 20 | 0.40 | S28 | 20 | 0.65 | S11 |
| 21 | 0.42 | S8 | 21 | 0.39 | S32 | 21 | 0.63 | S93 |
| 22 | 0.42 | S32 | 22 | 0.39 | S44 | 22 | 0.61 | S83 |
| 23 | 0.42 | S2 | 23 | 0.38 | S52 | 23 | 0.61 | S30 |
| 24 | 0.40 | S98 | 24 | 0.38 | S40 | 24 | 0.60 | S61 |
| 25 | 0.40 | S96 | 25 | 0.37 | S59 | 25 | 0.60 | S91 |
| 26 | 0.40 | S15 | 26 | 0.37 | S82 | 26 | 0.58 | S67 |
| 27 | 0.40 | S23 | 27 | 0.37 | S23 | 27 | 0.57 | S26 |
| 28 | 0.40 | S45 | 28 | 0.35 | S98 | 28 | 0.56 | S48 |
| 29 | 0.39 | S25 | 29 | 0.35 | S20 | 29 | 0.56 | S15 |
| 30 | 0.39 | S18 | 30 | 0.35 | S17 | 30 | 0.55 | S87 |
| 31 | 0.36 | S34 | 31 | 0.33 | S75 | 31 | 0.55 | S73 |
| 32 | 0.35 | S59 | 32 | 0.33 | S26 | 32 | 0.55 | S84 |
| 33 | 0.33 | S37 | 33 | 0.33 | S27 | 33 | 0.54 | S2 |
| 34 | 0.32 | S54 | 34 | 0.32 | S8 | 34 | 0.53 | S82 |
| 35 | 0.32 | S50 | 35 | 0.32 | S70 | 35 | 0.52 | S36 |
| 36 | 0.31 | S65 | 36 | 0.32 | S73 | 36 | 0.51 | S65 |
| 37 | 0.31 | S36 | 37 | 0.32 | S91 | 37 | 0.51 | S64 |
| 38 | 0.30 | S93 | 38 | 0.32 | S49 | 38 | 0.51 | S32 |
| 39 | 0.29 | S52 | 39 | 0.31 | S25 | 39 | 0.49 | S20 |
| 40 | 0.28 | S75 | 40 | 0.30 | S77 | 40 | 0.48 | S21 |
| 41 | 0.26 | S47 | 41 | 0.30 | S34 | 41 | 0.47 | S47 |
| 42 | 0.26 | S73 | 42 | 0.27 | S65 | 42 | 0.47 | S98 |
| 43 | 0.25 | S51 | 43 | 0.26 | S64 | 43 | 0.46 | S50 |
| 44 | 0.24 | S30 | 44 | 0.26 | S21 | 44 | 0.45 | S35 |
| 45 | 0.23 | S62 | 45 | 0.25 | S30 | 45 | 0.44 | S62 |
| 46 | 0.23 | S44 | 46 | 0.25 | S55 | 46 | 0.44 | S68 |
| 47 | 0.23 | S22 | 47 | 0.25 | S36 | 47 | 0.43 | S40 |
| 48 | 0.22 | S21 | 48 | 0.25 | S96 | 48 | 0.40 | S52 |
| 49 | 0.22 | S67 | 49 | 0.24 | S94 | 49 | 0.40 | S5 |
| 50 | 0.22 | S61 | 50 | 0.23 | S45 | 50 | 0.39 | S45 |
| 51 | 0.21 | S83 | 51 | 0.23 | S53 | 51 | 0.39 | S75 |
| 52 | 0.21 | S40 | 52 | 0.23 | S62 | 52 | 0.38 | S70 |
| 53 | 0.19 | S29 | 53 | 0.22 | S50 | 53 | 0.38 | S23 |
| 54 | 0.17 | S79 | 54 | 0.22 | S67 | 54 | 0.37 | S94 |
| 55 | 0.17 | S5 | 55 | 0.21 | S22 | 55 | 0.37 | S25 |
| 56 | 0.15 | S94 | 56 | 0.19 | S5 | 56 | 0.35 | S27 |
| 57 | 0.14 | S27 | 57 | 0.19 | S39 | 57 | 0.32 | S96 |
| 58 | 0.14 | S91 | 58 | 0.19 | S42 | 58 | 0.32 | S90 |
| 59 | 0.12 | S81 | 59 | 0.17 | S68 | 59 | 0.32 | S22 |
| 60 | 0.11 | S90 | 60 | 0.17 | S79 | 60 | 0.30 | S44 |
| 61 | 0.09 | S17 | 61 | 0.17 | S84 | 61 | 0.30 | S10 |
| 62 | 0.07 | S14 | 62 | 0.16 | S92 | 62 | 0.28 | S49 |
| 63 | 0.07 | S70 | 63 | 0.16 | S13 | 63 | 0.27 | S85 |
| 64 | 0.07 | S97 | 64 | 0.15 | S31 | 64 | 0.26 | S17 |
| 65 | 0.06 | S92 | 65 | 0.15 | S93 | 65 | 0.24 | S86 |
| 66 | 0.06 | S43 | 66 | 0.14 | S29 | 66 | 0.23 | S39 |
| 67 | 0.06 | S35 | 67 | 0.13 | S35 | 67 | 0.23 | S79 |
| 68 | 0.06 | S78 | 68 | 0.11 | S83 | 68 | 0.23 | S43 |
| 69 | 0.05 | S84 | 69 | 0.11 | S43 | 69 | 0.23 | S53 |
| 70 | 0.05 | S53 | 70 | 0.10 | S69 | 70 | 0.21 | S97 |
| 71 | 0.04 | S86 | 71 | 0.10 | S90 | 71 | 0.19 | S1 |
| 72 | 0.01 | S89 | 72 | 0.10 | S61 | 72 | 0.19 | S31 |
| 73 | 0.01 | S39 | 73 | 0.10 | S10 | 73 | 0.18 | S14 |
| 74 | -0.01 | S49 | 74 | 0.09 | S1 | 74 | 0.18 | S29 |
| 75 | -0.01 | S57 | 75 | 0.08 | S97 | 75 | 0.17 | S42 |
| 76 | -0.02 | S74 | 76 | 0.07 | S81 | 76 | 0.16 | S80 |
| 77 | -0.02 | S69 | 77 | 0.07 | S80 | 77 | 0.15 | S13 |
| 78 | -0.03 | S10 | 78 | 0.07 | S4 | 78 | 0.13 | S6 |
| 79 | -0.05 | S41 | 79 | 0.06 | S89 | 79 | 0.12 | S69 |
| 80 | -0.05 | S80 | 80 | 0.06 | S86 | 80 | 0.11 | S7 |
| 81 | -0.05 | S72 | 81 | 0.06 | S85 | 81 | 0.11 | S51 |
| 82 | -0.06 | S1 | 82 | 0.05 | S51 | 82 | 0.11 | S81 |
| 83 | -0.09 | S68 | 83 | 0.04 | S38 | 83 | 0.11 | S78 |
| 84 | -0.09 | S31 | 84 | 0.04 | S14 | 84 | 0.11 | S92 |
| 85 | -0.10 | S6 | 85 | 0.04 | S46 | 85 | 0.10 | S57 |
| 86 | -0.10 | S4 | 86 | 0.03 | S78 | 86 | 0.10 | S46 |
| 87 | -0.10 | S46 | 87 | 0.03 | S63 | 87 | 0.07 | S74 |
| 88 | -0.11 | S7 | 88 | 0.02 | S7 | 88 | 0.03 | S38 |
| 89 | -0.11 | S76 | 89 | 0.02 | S6 | 89 | 0.02 | S41 |
| 90 | -0.11 | S13 | 90 | 0.00 | S72 | 90 | 0.00 | S76 |
| 91 | -0.13 | S42 | 91 | 0.00 | S74 | 91 | -0.01 | S89 |
| 92 | -0.14 | S16 | 92 | -0.06 | S12 | 92 | -0.02 | S72 |
| 93 | -0.15 | S85 | 93 | -0.06 | S88 | 93 | -0.04 | S88 |
| 94 | -0.16 | S88 | 94 | -0.08 | S76 | 94 | -0.06 | S33 |
| 95 | -0.18 | S38 | 95 | -0.10 | S57 | 95 | -0.08 | S63 |
| 96 | -0.20 | S63 | 96 | -0.11 | S41 | 96 | -0.11 | S16 |
| 97 | -0.21 | S33 | 97 | -0.15 | S33 | 97 | -0.14 | S4 |
| 98 | -0.40 | S12 | 98 | -0.21 | S16 | 98 | -0.16 | S12 |

**Table S3.** Score table of principal component comprehensive evaluation of 98 olive varieties under different maturity levels (Ⅰ ~ Ⅲ)

| **Ⅰ** | | | **Ⅱ** | | | **Ⅲ** | | |
| --- | --- | --- | --- | --- | --- | --- | --- | --- |
| **Rating** | **Score** | **Variety number** | **Rating** | **Score** | **Variety number** | **Rating** | **Score** | **Variety number** |
| 1 | 0.89 | S95 | 1 | 0.95 | S60 | 1 | 1.46 | S60 |
| 2 | 0.85 | S66 | 2 | 0.85 | S66 | 2 | 1.38 | S66 |
| 3 | 0.77 | S56 | 3 | 0.70 | S71 | 3 | 1.14 | S56 |
| 4 | 0.76 | S19 | 4 | 0.68 | S87 | 4 | 1.09 | S9 |
| 5 | 0.75 | S9 | 5 | 0.67 | S19 | 5 | 1.04 | S71 |
| 6 | 0.72 | S48 | 6 | 0.65 | S56 | 6 | 0.95 | S58 |
| 7 | 0.70 | S71 | 7 | 0.62 | S3 | 7 | 0.84 | S59 |
| 8 | 0.65 | S58 | 8 | 0.62 | S95 | 8 | 0.76 | S18 |
| 9 | 0.63 | S60 | 9 | 0.61 | S9 | 9 | 0.75 | S3 |
| 10 | 0.60 | S3 | 10 | 0.59 | S58 | 10 | 0.73 | S34 |
| 11 | 0.55 | S77 | 11 | 0.58 | S11 | 11 | 0.73 | S24 |
| 12 | 0.54 | S11 | 12 | 0.49 | S24 | 12 | 0.72 | S54 |
| 13 | 0.52 | S20 | 13 | 0.48 | S2 | 13 | 0.70 | S8 |
| 14 | 0.52 | S82 | 14 | 0.47 | S47 | 14 | 0.70 | S28 |
| 15 | 0.51 | S26 | 15 | 0.46 | S18 | 15 | 0.70 | S19 |
| 16 | 0.50 | S55 | 16 | 0.45 | S48 | 16 | 0.70 | S55 |
| 17 | 0.50 | S87 | 17 | 0.41 | S37 | 17 | 0.68 | S77 |
| 18 | 0.50 | S28 | 18 | 0.41 | S54 | 18 | 0.67 | S95 |
| 19 | 0.46 | S24 | 19 | 0.41 | S15 | 19 | 0.65 | S37 |
| 20 | 0.44 | S64 | 20 | 0.40 | S28 | 20 | 0.65 | S11 |
| 21 | 0.42 | S8 | 21 | 0.39 | S32 | 21 | 0.63 | S93 |
| 22 | 0.42 | S32 | 22 | 0.39 | S44 | 22 | 0.61 | S83 |
| 23 | 0.42 | S2 | 23 | 0.38 | S52 | 23 | 0.61 | S30 |
| 24 | 0.40 | S98 | 24 | 0.38 | S40 | 24 | 0.60 | S61 |
| 25 | 0.40 | S96 | 25 | 0.37 | S59 | 25 | 0.60 | S91 |
| 26 | 0.40 | S15 | 26 | 0.37 | S82 | 26 | 0.58 | S67 |
| 27 | 0.40 | S23 | 27 | 0.37 | S23 | 27 | 0.57 | S26 |
| 28 | 0.40 | S45 | 28 | 0.35 | S98 | 28 | 0.56 | S48 |
| 29 | 0.39 | S25 | 29 | 0.35 | S20 | 29 | 0.56 | S15 |
| 30 | 0.39 | S18 | 30 | 0.35 | S17 | 30 | 0.55 | S87 |
| 31 | 0.36 | S34 | 31 | 0.33 | S75 | 31 | 0.55 | S73 |
| 32 | 0.35 | S59 | 32 | 0.33 | S26 | 32 | 0.55 | S84 |
| 33 | 0.33 | S37 | 33 | 0.33 | S27 | 33 | 0.54 | S2 |
| 34 | 0.32 | S54 | 34 | 0.32 | S8 | 34 | 0.53 | S82 |
| 35 | 0.32 | S50 | 35 | 0.32 | S70 | 35 | 0.52 | S36 |
| 36 | 0.31 | S65 | 36 | 0.32 | S73 | 36 | 0.51 | S65 |
| 37 | 0.31 | S36 | 37 | 0.32 | S91 | 37 | 0.51 | S64 |
| 38 | 0.30 | S93 | 38 | 0.32 | S49 | 38 | 0.51 | S32 |
| 39 | 0.29 | S52 | 39 | 0.31 | S25 | 39 | 0.49 | S20 |
| 40 | 0.28 | S75 | 40 | 0.30 | S77 | 40 | 0.48 | S21 |
| 41 | 0.26 | S47 | 41 | 0.30 | S34 | 41 | 0.47 | S47 |
| 42 | 0.26 | S73 | 42 | 0.27 | S65 | 42 | 0.47 | S98 |
| 43 | 0.25 | S51 | 43 | 0.26 | S64 | 43 | 0.46 | S50 |
| 44 | 0.24 | S30 | 44 | 0.26 | S21 | 44 | 0.45 | S35 |
| 45 | 0.23 | S62 | 45 | 0.25 | S30 | 45 | 0.44 | S62 |
| 46 | 0.23 | S44 | 46 | 0.25 | S55 | 46 | 0.44 | S68 |
| 47 | 0.23 | S22 | 47 | 0.25 | S36 | 47 | 0.43 | S40 |
| 48 | 0.22 | S21 | 48 | 0.25 | S96 | 48 | 0.40 | S52 |
| 49 | 0.22 | S67 | 49 | 0.24 | S94 | 49 | 0.40 | S5 |
| 50 | 0.22 | S61 | 50 | 0.23 | S45 | 50 | 0.39 | S45 |
| 51 | 0.21 | S83 | 51 | 0.23 | S53 | 51 | 0.39 | S75 |
| 52 | 0.21 | S40 | 52 | 0.23 | S62 | 52 | 0.38 | S70 |
| 53 | 0.19 | S29 | 53 | 0.22 | S50 | 53 | 0.38 | S23 |
| 54 | 0.17 | S79 | 54 | 0.22 | S67 | 54 | 0.37 | S94 |
| 55 | 0.17 | S5 | 55 | 0.21 | S22 | 55 | 0.37 | S25 |
| 56 | 0.15 | S94 | 56 | 0.19 | S5 | 56 | 0.35 | S27 |
| 57 | 0.14 | S27 | 57 | 0.19 | S39 | 57 | 0.32 | S96 |
| 58 | 0.14 | S91 | 58 | 0.19 | S42 | 58 | 0.32 | S90 |
| 59 | 0.12 | S81 | 59 | 0.17 | S68 | 59 | 0.32 | S22 |
| 60 | 0.11 | S90 | 60 | 0.17 | S79 | 60 | 0.30 | S44 |
| 61 | 0.09 | S17 | 61 | 0.17 | S84 | 61 | 0.30 | S10 |
| 62 | 0.07 | S14 | 62 | 0.16 | S92 | 62 | 0.28 | S49 |
| 63 | 0.07 | S70 | 63 | 0.16 | S13 | 63 | 0.27 | S85 |
| 64 | 0.07 | S97 | 64 | 0.15 | S31 | 64 | 0.26 | S17 |
| 65 | 0.06 | S92 | 65 | 0.15 | S93 | 65 | 0.24 | S86 |
| 66 | 0.06 | S43 | 66 | 0.14 | S29 | 66 | 0.23 | S39 |
| 67 | 0.06 | S35 | 67 | 0.13 | S35 | 67 | 0.23 | S79 |
| 68 | 0.06 | S78 | 68 | 0.11 | S83 | 68 | 0.23 | S43 |
| 69 | 0.05 | S84 | 69 | 0.11 | S43 | 69 | 0.23 | S53 |
| 70 | 0.05 | S53 | 70 | 0.10 | S69 | 70 | 0.21 | S97 |
| 71 | 0.04 | S86 | 71 | 0.10 | S90 | 71 | 0.19 | S1 |
| 72 | 0.01 | S89 | 72 | 0.10 | S61 | 72 | 0.19 | S31 |
| 73 | 0.01 | S39 | 73 | 0.10 | S10 | 73 | 0.18 | S14 |
| 74 | -0.01 | S49 | 74 | 0.09 | S1 | 74 | 0.18 | S29 |
| 75 | -0.01 | S57 | 75 | 0.08 | S97 | 75 | 0.17 | S42 |
| 76 | -0.02 | S74 | 76 | 0.07 | S81 | 76 | 0.16 | S80 |
| 77 | -0.02 | S69 | 77 | 0.07 | S80 | 77 | 0.15 | S13 |
| 78 | -0.03 | S10 | 78 | 0.07 | S4 | 78 | 0.13 | S6 |
| 79 | -0.05 | S41 | 79 | 0.06 | S89 | 79 | 0.12 | S69 |
| 80 | -0.05 | S80 | 80 | 0.06 | S86 | 80 | 0.11 | S7 |
| 81 | -0.05 | S72 | 81 | 0.06 | S85 | 81 | 0.11 | S51 |
| 82 | -0.06 | S1 | 82 | 0.05 | S51 | 82 | 0.11 | S81 |
| 83 | -0.09 | S68 | 83 | 0.04 | S38 | 83 | 0.11 | S78 |
| 84 | -0.09 | S31 | 84 | 0.04 | S14 | 84 | 0.11 | S92 |
| 85 | -0.10 | S6 | 85 | 0.04 | S46 | 85 | 0.10 | S57 |
| 86 | -0.10 | S4 | 86 | 0.03 | S78 | 86 | 0.10 | S46 |
| 87 | -0.10 | S46 | 87 | 0.03 | S63 | 87 | 0.07 | S74 |
| 88 | -0.11 | S7 | 88 | 0.02 | S7 | 88 | 0.03 | S38 |
| 89 | -0.11 | S76 | 89 | 0.02 | S6 | 89 | 0.02 | S41 |
| 90 | -0.11 | S13 | 90 | 0.00 | S72 | 90 | 0.00 | S76 |
| 91 | -0.13 | S42 | 91 | 0.00 | S74 | 91 | -0.01 | S89 |
| 92 | -0.14 | S16 | 92 | -0.06 | S12 | 92 | -0.02 | S72 |
| 93 | -0.15 | S85 | 93 | -0.06 | S88 | 93 | -0.04 | S88 |
| 94 | -0.16 | S88 | 94 | -0.08 | S76 | 94 | -0.06 | S33 |
| 95 | -0.18 | S38 | 95 | -0.10 | S57 | 95 | -0.08 | S63 |
| 96 | -0.20 | S63 | 96 | -0.11 | S41 | 96 | -0.11 | S16 |
| 97 | -0.21 | S33 | 97 | -0.15 | S33 | 97 | -0.14 | S4 |
| 98 | -0.40 | S12 | 98 | -0.21 | S16 | 98 | -0.16 | S12 |
